# Supplementary material for: The Quality of Eggs Derived from Japanese Quail Fed with the Fermented and Non-Fermented Rapeseed Meal
Source: MDPI journal article supplement (doi:10.3390/foods11162492), 2022-08-18
Supplement: s1 [file s1]

Table S1. The quality characteristics of whole eggs of Japanese quails depending on the dose and fermentation of rapeseed meal applied

| Group            |          |            | C                                 | RM5                               | RM10                              | RM15                              | FRM5                              | FRM10                             | FRM15                            | Total               | SEM    |
|------------------|----------|------------|-----------------------------------|-----------------------------------|-----------------------------------|-----------------------------------|-----------------------------------|-----------------------------------|----------------------------------|---------------------|--------|
| Trait            |          | term (wks) |                                   |                                   |                                   |                                   |                                   |                                   |                                  |                     |        |
| Egg weight (g)   |          | 0          | 9.72 <sub>w</sub>                 | 10.1 <sub>w</sub>                 | 9.82 <sub>w</sub>                 | 9.35 <sub>w</sub>                 | 9.48 <sub>w</sub>                 | 9.92 <sub>w</sub>                 | 9.94 <sub>w</sub>                | 9.97 <sub>w</sub>   | 0.101  |
|                  |          | 4          | 10.38 <sup>bc</sup> <sub>w</sub>  | 9.81 <sup>a</sup> <sub>w</sub>    | 10.01 <sup>abc</sup> <sub>w</sub> | 10.11 <sup>abc</sup> <sub>x</sub> | 10.09 <sup>abc</sup> <sub>x</sub> | 10.53 <sup>c</sup> <sub>x</sub>   | 9.93 <sup>ab</sup> <sub>w</sub>  | 10.12 <sub>x</sub>  | 0.073  |
|                  |          | 8          | 11.25 <sup>b</sup> <sub>x</sub>   | 10.70 <sup>ab</sup> <sub>x</sub>  | 10.83 <sup>ab</sup> <sub>x</sub>  | 11.04 <sup>a</sup> <sub>xy</sub>  | 11.14 <sup>b</sup> <sub>y</sub>   | 10.99 <sup>ab</sup> <sub>xy</sub> | 11.09 <sup>b</sup> <sub>x</sub>  | 10.86 <sub>y</sub>  | 0.128  |
|                  |          | 12         | 11.54 <sup>b</sup> <sub>x</sub>   | 10.95 <sup>ab</sup> <sub>x</sub>  | 11.28 <sup>ab</sup> <sub>x</sub>  | 11.12 <sup>ab</sup> <sub>y</sub>  | 11.08 <sup>ab</sup> <sub>y</sub>  | 11.30 <sup>ab</sup> <sub>y</sub>  | 11.52 <sup>b</sup> <sub>x</sub>  | 11.25 <sub>z</sub>  | 0.066  |
|                  |          | Total      | 10.79 <sup>b</sup>                | 10.42 <sup>ab</sup>               | 10.57 <sup>b</sup>                | 10.14 <sup>a</sup>                | 10.57 <sup>b</sup>                | 10.75 <sup>b</sup>                | 10.63 <sup>b</sup>               |                     | 0.054  |
| Specific gravity |          | 0          | 1.072 <sub>x</sub>                | 1.077 <sub>y</sub>                | 1.076 <sub>x</sub>                | 1.075 <sub>y</sub>                | 1.074 <sub>x</sub>                | 1.074                             | 1.074 <sub>y</sub>               | 1.075 <sub>y</sub>  | 0.0007 |
|                  |          | 4          | 1.069 <sup>ab</sup> <sub>wx</sub> | 1.069 <sup>ab</sup> <sub>wx</sub> | 1.067 <sup>a</sup> <sub>w</sub>   | 1.071 <sup>ab</sup> <sub>x</sub>  | 1.070 <sup>ab</sup> <sub>x</sub>  | 1.068 <sup>ab</sup>               | 1.073 <sup>b</sup> <sub>xy</sub> | 1.070 <sub>x</sub>  | 0.0007 |
|                  |          | 8          | 1.065 <sup>ab</sup> <sub>w</sub>  | 1.073 <sup>b</sup> <sub>xy</sub>  | 1.068 <sup>ab</sup> <sub>w</sub>  | 1.069 <sup>ab</sup> <sub>wx</sub> | 1.062 <sup>a</sup> <sub>w</sub>   | 1.068 <sup>ab</sup>               | 1.064 <sup>ab</sup> <sub>w</sub> | 1.067 <sub>w</sub>  | 0.0012 |
|                  |          | 12         | 1.069 <sub>wx</sub>               | 1.068 <sub>w</sub>                | 1.068 <sub>w</sub>                | 1.067 <sub>x</sub>                | 1.067 <sub>wx</sub>               | 1.068                             | 1.068 <sub>wx</sub>              | 1.070 <sub>x</sub>  | 0.0005 |
|                  |          | Total      | 1.068 <sup>ab</sup>               | 1.071 <sup>b</sup>                | 1.069 <sup>ab</sup>               | 1.070 <sup>ab</sup>               | 1.067 <sup>a</sup>                | 1.069 <sup>ab</sup>               | 1.070 <sup>ab</sup>              |                     | 0.000  |
| Proportions (%)  | eggshell | 0          | 12.80 <sup>a</sup> <sub>w</sub>   | 14.50 <sup>b</sup> <sub>x</sub>   | 15.72 <sup>b</sup> <sub>x</sub>   | 14.34 <sup>b</sup>                | 14.87 <sup>b</sup> <sub>x</sub>   | 14.26 <sup>ab</sup> <sub>wx</sub> | 15.17 <sup>b</sup> <sub>y</sub>  | 14.37               | 0.201  |
|                  |          | 4          | 14.2 <sup>ab</sup> <sub>x</sub>   | 14.49 <sup>b</sup> <sub>x</sub>   | 13.43 <sup>ab</sup> <sub>y</sub>  | 13.01 <sup>a</sup>                | 13.71 <sup>ab</sup> <sub>x</sub>  | 13.67 <sup>ab</sup> <sub>wx</sub> | 13.79 <sup>ab</sup> <sub>x</sub> | 13.77               | 0.170  |
|                  |          | 8          | 14.51 <sup>a</sup> <sub>x</sub>   | 13.19 <sup>a</sup> <sub>w</sub>   | 13.89 <sup>a</sup> <sub>y</sub>   | 15.61 <sup>b</sup>                | 13.47 <sup>a</sup> <sub>x</sub>   | 13.40 <sup>a</sup> <sub>w</sub>   | 12.84 <sup>a</sup> <sub>w</sub>  | 14.67               | 1.835  |
|                  |          | 12         | 13.78 <sub>wx</sub>               | 13.72 <sub>wx</sub>               | 13.88 <sub>y</sub>                | 13.78                             | 14.24 <sub>wx</sub>               | 14.51 <sub>x</sub>                | 13.96 <sub>xy</sub>              | 13.98               | 0.126  |
|                  |          | Total      | 13.91 <sup>a</sup>                | 13.93 <sup>a</sup>                | 14.02 <sup>a</sup>                | 18.20 <sup>b</sup>                | 13.97 <sup>a</sup>                | 13.93 <sup>a</sup>                | 13.92 <sup>a</sup>               |                     | 0.499  |
|                  | albumen  | 0          | 61.39 <sup>c</sup> <sub>y</sub>   | 57.58 <sup>a</sup>                | 57.54 <sup>a</sup>                | 59.49 <sup>abc</sup> <sub>y</sub> | 59.88 <sup>abc</sup> <sub>x</sub> | 60.57 <sup>bc</sup> <sub>y</sub>  | 58.37 <sup>bc</sup> <sub>y</sub> | 59.32 <sub>x</sub>  | 0.384  |
|                  |          | 4          | 57.10 <sub>wx</sub>               | 57.12                             | 58.18                             | 58.72 <sub>y</sub>                | 57.59 <sub>wx</sub>               | 57.82 <sub>x</sub>                | 57.37 <sub>xy</sub>              | 57.70 <sub>wy</sub> | 0.219  |
|                  |          | 8          | 58.45 <sup>b</sup> <sub>xy</sub>  | 57.86 <sup>b</sup>                | 58.57 <sup>b</sup>                | 53.00 <sup>a</sup> <sub>w</sub>   | 60.15 <sup>b</sup> <sub>x</sub>   | 58.22 <sup>b</sup> <sub>x</sub>   | 55.84 <sup>b</sup> <sub>wx</sub> | 54.71 <sub>w</sub>  | 2.821  |
|                  |          | 12         | 53.78 <sub>w</sub>                | 55.44                             | 55.80                             | 55.66 <sub>x</sub>                | 53.72 <sub>w</sub>                | 55.13 <sub>w</sub>                | 54.96 <sub>w</sub>               | 54.92 <sub>w</sub>  | 0.281  |
|                  |          | Total      | 57.45                             | 56.94                             | 57.55                             | 52.00                             | 57.58                             | 57.72                             | 56.62                            |                     | 0.773  |
|                  | yolk     | 0          | 25.81 <sup>ab</sup> <sub>w</sub>  | 27.92 <sup>b</sup> <sub>w</sub>   | 26.73 <sup>ab</sup> <sub>w</sub>  | 26.18 <sup>ab</sup>               | 25.25 <sup>a</sup> <sub>w</sub>   | 26.46 <sup>ab</sup> <sub>w</sub>  | 26.45 <sup>ab</sup> <sub>w</sub> | 26.39 <sub>w</sub>  | 0.320  |
|                  |          | 4          | 28.63 <sub>w</sub>                | 28.40 <sub>w</sub>                | 28.39 <sub>x</sub>                | 28.27                             | 28.69 <sub>x</sub>                | 28.51 <sub>w</sub>                | 28.84 <sub>x</sub>               | 28.53 <sub>w</sub>  | 0.157  |
|                  |          | 8          | 29.18 <sub>w</sub>                | 30.20 <sub>x</sub>                | 30.83 <sub>y</sub>                | 31.08                             | 29.91 <sub>xy</sub>               | 28.39 <sub>w</sub>                | 31.32 <sub>y</sub>               | 35.15 <sub>z</sub>  | 3.618  |
|                  |          | 12         | 32.44 <sup>b</sup> <sub>x</sub>   | 30.84 <sup>ab</sup> <sub>x</sub>  | 30.32 <sup>a</sup> <sub>y</sub>   | 30.56 <sup>a</sup>                | 30.03 <sup>ab</sup> <sub>y</sub>  | 30.36 <sup>a</sup> <sub>x</sub>   | 31.00 <sup>ab</sup> <sub>y</sub> | 31.10 <sub>wx</sub> | 0.229  |
|                  |          | Total      | 29.23 <sup>a</sup>                | 29.47 <sup>a</sup>                | 29.39 <sup>a</sup>                | 37.74 <sup>b</sup>                | 29.44 <sup>a</sup>                | 28.59 <sup>a</sup>                | 29.46 <sup>a</sup>               |                     | 0.988  |

<sup>a-d</sup> means in the same row (group) significant at  $p \leq 0.05$ ; <sub>w-z</sub> means in the same column (terms) significant at  $p \leq 0.05$ ; SEM+ standard error of mean; C - control group; RM5, RM10, RM15- 5%, 10%, 15% of post-extraction rapeseed meal respectively; FRM5, FRM10, FRM15- 5%, 10%, 15% of fermented post-extraction rapeseed meal respectively

Table S2. The quality characteristics of yolk of Japanese quails eggs depending on the dose and fermentation of rapeseed meal applied

| Group        |            | C                               | RM5                              | RM10                                         | RM15                             | FRM5                             | FRM10                            | FRM15                            | Total              | SEM   |
|--------------|------------|---------------------------------|----------------------------------|----------------------------------------------|----------------------------------|----------------------------------|----------------------------------|----------------------------------|--------------------|-------|
| Trait        | term (wks) |                                 |                                  |                                              |                                  |                                  |                                  |                                  |                    |       |
| Colour (pts) | 0          | 9.80 <sup>b</sup> <sub>x</sub>  | 9.46 <sup>ab</sup> <sub>wx</sub> | 8.80 <sup>a</sup> <sub>w</sub>               | 8.66 <sup>a</sup> <sub>w</sub>   | 9.27 <sup>ab</sup> <sub>w</sub>  | 9.07 <sup>ab</sup> <sub>w</sub>  | 8.86 <sup>a</sup> <sub>w</sub>   | 9.07 <sub>w</sub>  | 0.122 |
|              | 4          | 10.05 <sup>a</sup> <sub>x</sub> | 10.50 <sup>bc</sup> <sub>y</sub> | 10.80 <sup>c</sup> <sub>y</sub>              | 10.80 <sup>c</sup> <sub>y</sub>  | 10.60 <sup>bc</sup> <sub>x</sub> | 10.70 <sup>bc</sup> <sub>y</sub> | 10.30 <sup>ab</sup> <sub>x</sub> | 10.54 <sub>z</sub> | 0.055 |
|              | 8          | 8.95 <sup>a</sup> <sub>w</sub>  | 9.55 <sup>ab</sup> <sub>x</sub>  | 10.05 <sup>b</sup> <sub>c</sub> <sub>x</sub> | 10.45 <sup>c</sup> <sub>y</sub>  | 10.25 <sup>c</sup> <sub>x</sub>  | 10.00 <sup>bc</sup> <sub>x</sub> | 10.45 <sup>c</sup> <sub>x</sub>  | 9.95 <sub>y</sub>  | 0.091 |
|              | 12         | 9.05 <sup>ab</sup> <sub>w</sub> | 8.90 <sup>a</sup> <sub>w</sub>   | 10.16 <sup>d</sup> <sub>x</sub>              | 9.65 <sup>bcd</sup> <sub>x</sub> | 9.20 <sup>abc</sup> <sub>w</sub> | 9.80 <sup>cd</sup> <sub>x</sub>  | 10.20 <sup>d</sup> <sub>x</sub>  | 9.56 <sub>x</sub>  | 0.103 |
|              | Total      | 9.43 <sup>a</sup>               | 9.62 <sup>ab</sup>               | 10.12 <sup>c</sup>                           | 9.88 <sup>bc</sup>               | 9.90 <sup>bc</sup>               | 9.96 <sup>bc</sup>               | 9.92 <sup>bc</sup>               |                    | 0.051 |
| Weight (g)   | 0          | 2.49 <sup>a</sup> <sub>w</sub>  | 2.85 <sup>b</sup> <sub>w</sub>   | 2.62 <sup>ab</sup> <sub>w</sub>              | 2.44 <sup>a</sup> <sub>w</sub>   | 2.40 <sup>a</sup> <sub>w</sub>   | 2.61 <sup>ab</sup> <sub>w</sub>  | 2.62 <sup>ab</sup> <sub>w</sub>  | 2.57 <sub>w</sub>  | 0.039 |
|              | 4          | 2.98 <sup>ab</sup> <sub>x</sub> | 2.78 <sup>a</sup> <sub>w</sub>   | 2.83 <sup>ab</sup> <sub>x</sub>              | 2.86 <sup>ab</sup> <sub>x</sub>  | 2.90 <sup>ab</sup> <sub>x</sub>  | 3.00 <sup>ab</sup> <sub>x</sub>  | 2.83 <sup>ab</sup> <sub>w</sub>  | 2.89 <sub>x</sub>  | 0.027 |
|              | 8          | 3.26 <sup>a</sup> <sub>x</sub>  | 3.27 <sup>ab</sup> <sub>x</sub>  | 3.34 <sup>bc</sup> <sub>y</sub>              | 3.42 <sup>c</sup> <sub>y</sub>   | 3.35 <sup>c</sup> <sub>y</sub>   | 3.11 <sup>bc</sup> <sub>x</sub>  | 3.48 <sup>c</sup> <sub>x</sub>   | 3.32 <sub>y</sub>  | 0.047 |
|              | 12         | 3.75 <sup>ab</sup> <sub>y</sub> | 3.38 <sup>a</sup> <sub>x</sub>   | 3.42 <sup>d</sup> <sub>y</sub>               | 3.40 <sup>bcd</sup> <sub>y</sub> | 3.54 <sup>abc</sup> <sub>y</sub> | 3.44 <sup>cd</sup> <sub>y</sub>  | 3.58 <sup>d</sup> <sub>x</sub>   | 3.50 <sub>z</sub>  | 0.031 |
|              | Total      | 3.16                            | 3.09                             | 3.11                                         | 3.02                             | 3.13                             | 3.08                             | 3.14                             |                    | 0.024 |
| Acidity (pH) | 0          | 6.03 <sub>w</sub>               | 6.10 <sub>w</sub>                | 6.15 <sub>x</sub>                            | 6.36 <sub>y</sub>                | 5.98 <sub>x</sub>                | 6.31                             | 6.25 <sub>x</sub>                | 6.17 <sub>x</sub>  | 0.030 |
|              | 4          | 6.23 <sup>a</sup> <sub>y</sub>  | 6.28 <sup>ab</sup> <sub>y</sub>  | 6.37 <sup>c</sup> <sub>y</sub>               | 6.38 <sup>c</sup> <sub>z</sub>   | 6.32 <sup>c</sup> <sub>y</sub>   | 6.32 <sup>bc</sup>               | 6.33 <sup>abc</sup> <sub>y</sub> | 6.31 <sub>y</sub>  | 0.009 |
|              | 8          | 6.10 <sup>bc</sup> <sub>z</sub> | 6.21 <sup>c</sup> <sub>x</sub>   | 6.09 <sup>c</sup> <sub>w</sub>               | 6.26 <sup>bc</sup> <sub>x</sub>  | 5.98 <sup>bc</sup> <sub>x</sub>  | 6.18 <sup>a</sup>                | 6.20 <sup>a</sup> <sub>w</sub>   | 6.14 <sub>x</sub>  | 0.010 |
|              | 12         | 5.83 <sup>bc</sup> <sub>x</sub> | 5.85 <sup>c</sup> <sub>w</sub>   | 5.84 <sup>c</sup> <sub>w</sub>               | 5.84 <sup>bc</sup> <sub>w</sub>  | 5.79 <sup>bc</sup> <sub>w</sub>  | 5.69 <sup>a</sup>                | 5.77 <sup>b</sup> <sub>x</sub>   | 5.80 <sub>w</sub>  | 0.009 |
|              | Total      | 6.05 <sup>ab</sup>              | 6.11 <sup>ab</sup>               | 6.11 <sup>ab</sup>                           | 6.18 <sup>b</sup>                | 6.02 <sup>a</sup>                | 6.08 <sup>ab</sup>               | 6.09 <sup>ab</sup>               |                    | 0.014 |

<sup>a-d</sup>— means in the same row (group) significant at  $p \leq 0.05$ ; <sub>w-z</sub> — means in the same column (terms) significant at  $p \leq 0.05$ ; SEM+ standard error of mean; C - control group; RM5, RM10, RM15— 5%, 10%, 15% of post-extraction rapeseed meal respectively; FRM5, FRM10, FRM15— 5%, 10%, 15% of fermented post-extraction rapeseed meal respectively

Table S3. The albumen quality characteristics of Japanese quail eggs depending on the dose and fermentation of rapeseed meal applied

| Group           |            | C                                | RM5                               | RM10                             | RM15                              | FRM5                             | FRM10                            | FRM15                            | Total              | SEM   |
|-----------------|------------|----------------------------------|-----------------------------------|----------------------------------|-----------------------------------|----------------------------------|----------------------------------|----------------------------------|--------------------|-------|
| Trait           | term (wks) |                                  |                                   |                                  |                                   |                                  |                                  |                                  |                    |       |
| Height (mm)     | 0          | 3.78 <sup>d</sup> <sub>w</sub>   | 3.58 <sup>bcd</sup> <sub>w</sub>  | 3.66 <sup>cd</sup> <sub>w</sub>  | 3.09 <sup>abc</sup> <sub>w</sub>  | 3.61 <sup>cd</sup> <sub>w</sub>  | 2.94 <sup>ab</sup> <sub>w</sub>  | 2.82 <sup>a</sup> <sub>w</sub>   | 3.30 <sub>w</sub>  | 0.088 |
|                 | 4          | 4.04 <sub>w</sub>                | 4.06 <sub>w</sub>                 | 3.77 <sub>w</sub>                | 3.95 <sub>x</sub>                 | 4.02 <sub>w</sub>                | 4.01 <sub>x</sub>                | 4.06 <sub>z</sub>                | 3.99 <sub>x</sub>  | 0.057 |
|                 | 8          | 3.63 <sub>w</sub>                | 3.89 <sub>w</sub>                 | 3.87 <sub>w</sub>                | 3.86 <sub>x</sub>                 | 3.45 <sub>w</sub>                | 3.76 <sub>x</sub>                | 3.86 <sub>z</sub>                | 3.76 <sub>y</sub>  | 0.075 |
|                 | 12         | 4.54 <sub>x</sub>                | 4.72 <sub>x</sub>                 | 4.81 <sub>x</sub>                | 4.40 <sub>y</sub>                 | 4.53 <sub>x</sub>                | 4.66 <sub>y</sub>                | 4.54 <sub>y</sub>                | 4.60 <sub>z</sub>  | 0.070 |
|                 | Total      | 4.01                             | 4.11                              | 4.07                             | 3.82                              | 3.94                             | 3.92                             | 3.84                             |                    | 0.040 |
| Haugh's units   | 0          | 86.71 <sup>c</sup> <sub>w</sub>  | 85.05 <sup>bc</sup> <sub>w</sub>  | 85.96 <sup>c</sup> <sub>w</sub>  | 82.87 <sup>abc</sup> <sub>w</sub> | 85.77 <sup>c</sup> <sub>wx</sub> | 81.29 <sup>ab</sup> <sub>w</sub> | 80.51 <sup>a</sup> <sub>w</sub>  | 83.67 <sub>w</sub> | 0.546 |
|                 | 4          | 87.12 <sub>wx</sub>              | 88.34 <sub>xy</sub>               | 86.42 <sub>w</sub>               | 87.42 <sub>x</sub>                | 87.98 <sub>xy</sub>              | 87.50 <sub>xy</sub>              | 88.32 <sub>xy</sub>              | 87.60 <sub>x</sub> | 0.319 |
|                 | 8          | 84.35 <sup>ab</sup> <sub>w</sub> | 86.56 <sup>ab</sup> <sub>wx</sub> | 86.35 <sup>ab</sup> <sub>w</sub> | 87.13 <sup>b</sup> <sub>x</sub>   | 83.08 <sup>a</sup> <sub>w</sub>  | 85.43 <sup>ab</sup> <sub>x</sub> | 86.04 <sup>ab</sup> <sub>x</sub> | 85.55 <sub>y</sub> | 0.513 |
|                 | 12         | 89.69 <sub>x</sub>               | 91.02 <sub>y</sub>                | 91.18 <sub>y</sub>               | 89.22 <sub>x</sub>                | 89.71 <sub>y</sub>               | 90.35 <sub>y</sub>               | 89.59 <sub>y</sub>               | 90.10 <sub>z</sub> | 0.400 |
|                 | Total      | 86.97                            | 88.00                             | 87.64                            | 86.61                             | 86.74                            | 86.53                            | 86.18                            |                    | 0.244 |
| Weight (g)      | 0          | 5.99                             | 5.82 <sub>w</sub>                 | 5.66 <sub>w</sub>                | 5.57 <sub>w</sub>                 | 5.67 <sub>w</sub>                | 6.02                             | 5.82 <sub>wx</sub>               | 5.73 <sub>w</sub>  | 0.078 |
|                 | 4          | 5.92 <sup>ab</sup>               | 5.61 <sup>a</sup> <sub>w</sub>    | 5.82 <sup>ab</sup> <sub>wx</sub> | 5.94 <sup>ab</sup> <sub>wx</sub>  | 5.81 <sup>ab</sup> <sub>w</sub>  | 6.09 <sup>b</sup>                | 5.69 <sup>a</sup> <sub>w</sub>   | 5.84 <sub>w</sub>  | 0.050 |
|                 | 8          | 6.65 <sup>b</sup>                | 6.20 <sup>ab</sup> <sub>x</sub>   | 6.33 <sup>ab</sup> <sub>y</sub>  | 5.39 <sup>a</sup> <sub>wx</sub>   | 6.70 <sup>b</sup> <sub>x</sub>   | 6.40 <sup>b</sup>                | 6.18 <sup>ab</sup> <sub>xy</sub> | 6.26 <sub>x</sub>  | 0.123 |
|                 | 12         | 6.21                             | 6.08 <sub>x</sub>                 | 6.29 <sub>xy</sub>               | 6.20 <sub>x</sub>                 | 5.98 <sub>w</sub>                | 6.23                             | 6.34 <sub>y</sub>                | 6.19 <sub>x</sub>  | 0.051 |
|                 | Total      | 6.21 <sup>b</sup>                | 5.93 <sup>ab</sup>                | 6.08 <sup>ab</sup>               | 5.77 <sup>a</sup>                 | 6.08 <sup>ab</sup>               | 6.19 <sup>b</sup>                | 6.01 <sup>ab</sup>               |                    | 0.044 |
| Alkalinity (pH) | 0          | 8.40 <sub>x</sub>                | 8.90 <sub>x</sub>                 | 9.00 <sub>y</sub>                | 9.07 <sub>y</sub>                 | 9.10 <sub>x</sub>                | 8.93 <sub>y</sub>                | 8.86 <sub>y</sub>                | 8.89 <sub>w</sub>  | 0.049 |
|                 | 4          | 9.24 <sup>ab</sup> <sub>y</sub>  | 9.27 <sup>b</sup> <sub>z</sub>    | 9.33 <sup>b</sup> <sub>z</sub>   | 9.24 <sup>b</sup> <sub>y</sub>    | 9.20 <sup>ab</sup> <sub>y</sub>  | 8.55 <sup>a</sup> <sub>y</sub>   | 9.29 <sup>b</sup> <sub>z</sub>   | 9.16 <sub>x</sub>  | 0.065 |
|                 | 8          | 9.00 <sup>a</sup> <sub>x</sub>   | 9.01 <sup>b</sup> <sub>y</sub>    | 8.83 <sup>b</sup> <sub>x</sub>   | 9.05 <sup>b</sup> <sub>x</sub>    | 9.05 <sup>ab</sup> <sub>x</sub>  | 9.12 <sup>ab</sup> <sub>x</sub>  | 8.63 <sup>b</sup> <sub>x</sub>   | 8.95 <sub>w</sub>  | 0.052 |
|                 | 12         | 8.71 <sup>a</sup> <sub>w</sub>   | 8.85 <sup>b</sup> <sub>w</sub>    | 8.82 <sup>b</sup> <sub>w</sub>   | 8.82 <sup>b</sup> <sub>w</sub>    | 8.78 <sup>ab</sup> <sub>w</sub>  | 8.78 <sup>ab</sup> <sub>w</sub>  | 8.84 <sup>b</sup> <sub>w</sub>   | 8.80 <sub>w</sub>  | 0.009 |
|                 | Total      | 8.94                             | 9.03                              | 8.99                             | 9.03                              | 9.02                             | 8.82                             | 8.91                             |                    | 0.024 |

<sup>a-d</sup>— means in the same row (group) significant at  $p \leq 0.05$ ; <sub>w-z</sub> — means in the same column (terms) significant at  $p \leq 0.05$ ; SEM+ standard error of mean; C - control group; RM5, RM10, RM15— 5%, 10%, 15% of post-extraction rapeseed meal respectively; FRM5, FRM10, FRM15— 5%, 10%, 15% of fermented post-extraction rapeseed meal respectively

Table S4. Eggshell quality traits of Japanese quail eggs depending on the dose and fermentation of rapeseed meal applied

| Group                        |            | C                                | RM5                              | RM10                             | RM15                            | FRM5                             | FRM10                              | FRM15                             | Total              | SEM   |
|------------------------------|------------|----------------------------------|----------------------------------|----------------------------------|---------------------------------|----------------------------------|------------------------------------|-----------------------------------|--------------------|-------|
| Trait                        | term (wks) |                                  |                                  |                                  |                                 |                                  |                                    |                                   |                    |       |
| Weight (g)                   | 0          | 1.25 <sup>a</sup> <sub>w</sub>   | 1.46 <sup>bc</sup>               | 1.54 <sup>c</sup> <sub>x</sub>   | 1.34 <sup>ab</sup> <sub>w</sub> | 1.41 <sup>abc</sup> <sub>w</sub> | 1.40 <sup>abc</sup> <sub>w</sub>   | 1.50 <sup>bc</sup> <sub>xy</sub>  | 1.41 <sub>w</sub>  | 0.022 |
|                              | 4          | 1.48 <sup>b</sup> <sub>x</sub>   | 1.42 <sup>ab</sup>               | 1.35 <sup>ab</sup> <sub>w</sub>  | 1.32 <sup>a</sup> <sub>w</sub>  | 1.37 <sup>ab</sup> <sub>w</sub>  | 1.43 <sup>ab</sup> <sub>w</sub>    | 1.37 <sup>ab</sup> <sub>w</sub>   | 1.39 <sub>w</sub>  | 0.018 |
|                              | 8          | 1.62 <sup>bc</sup> <sub>x</sub>  | 1.41 <sup>a</sup>                | 1.51 <sup>ab</sup> <sub>w</sub>  | 1.69 <sup>c</sup> <sub>y</sub>  | 1.50 <sup>ab</sup> <sub>x</sub>  | 1.47 <sup>a</sup> <sub>w</sub>     | 1.42 <sup>a</sup> <sub>wx</sub>   | 1.52 <sub>x</sub>  | 0.019 |
|                              | 12         | 1.59 <sup>ab</sup> <sub>x</sub>  | 1.50 <sup>a</sup>                | 1.57 <sup>ab</sup> <sub>x</sub>  | 1.53 <sup>a</sup> <sub>x</sub>  | 1.57 <sup>ab</sup> <sub>x</sub>  | 1.64 <sup>b</sup> <sub>x</sub>     | 1.61 <sup>ab</sup> <sub>y</sub>   | 1.57 <sub>y</sub>  | 0.015 |
|                              | Total      | 1.50                             | 1.44                             | 1.48                             | 1.46                            | 1.47                             | 1.49                               | 1.47                              |                    | 0.010 |
| Thickness (mm)               | 0          | 0.196 <sup>c</sup>               | 0.184 <sup>bc</sup>              | 0.169 <sup>ab</sup>              | 0.168 <sup>ab</sup>             | 0.153 <sup>a</sup>               | 0.164 <sup>ab</sup>                | 0.163 <sup>ab</sup>               | 0.171 <sub>w</sub> | 0.003 |
|                              | 4          | 0.171 <sup>a</sup>               | 0.173 <sup>a</sup>               | 0.179 <sup>ab</sup>              | 0.185 <sup>b</sup>              | 0.184 <sup>b</sup>               | 0.183 <sup>b</sup>                 | 0.180 <sup>ab</sup>               | 0.179 <sub>x</sub> | 0.001 |
|                              | 8          | 0.177 <sup>a</sup>               | 0.198 <sup>bc</sup>              | 0.192 <sup>b</sup>               | 0.212 <sup>cd</sup>             | 0.219 <sup>d</sup>               | 0.218 <sup>d</sup>                 | 0.204 <sup>bcd</sup>              | 0.203 <sub>z</sub> | 0.002 |
|                              | 12         | 0.187                            | 0.191                            | 0.189                            | 0.188                           | 0.193                            | 0.191                              | 0.182                             | 0.186 <sub>y</sub> | 0.003 |
|                              | Total      | 0.182                            | 0.187                            | 0.184                            | 0.188                           | 0.191                            | 0.191                              | 0.182                             |                    | 0.001 |
| Strength (N)                 | 0          | 10.66                            | 10.20                            | 12.99                            | 11.94                           | 11.38                            | 10.95                              | 12.13                             | 11.53              | 0.356 |
|                              | 4          | 12.55                            | 10.80                            | 11.51                            | 13.01                           | 12.01                            | 12.85                              | 12.15                             | 12.13              | 0.305 |
|                              | 8          | 10.31 <sup>a</sup>               | 12.88 <sup>ab</sup>              | 13.38 <sup>b</sup>               | 11.87 <sup>ab</sup>             | 11.57 <sup>ab</sup>              | 11.49 <sup>ab</sup>                | 12.15 <sup>ab</sup>               | 11.93              | 0.340 |
|                              | 12         | 12.47                            | 11.39                            | 12.01                            | 11.82                           | 12.45                            | 11.90                              | 12.04                             | 12.01              | 0.341 |
|                              | Total      | 11.54                            | 11.43                            | 12.40                            | 12.15                           | 11.89                            | 11.86                              | 12.12                             |                    | 0.168 |
| Density (g/cm <sup>3</sup> ) | 0          | 0.309 <sup>a</sup> <sub>w</sub>  | 0.356 <sup>ab</sup> <sub>x</sub> | 0.420 <sup>c</sup> <sub>x</sub>  | 0.388 <sup>bc</sup>             | 0.440 <sup>c</sup> <sub>y</sub>  | 0.417 <sup>bc</sup> <sub>y</sub>   | 0.423 <sup>c</sup> <sub>y</sub>   | 0.391 <sub>x</sub> | 0.009 |
|                              | 4          | 0.384 <sup>c</sup> <sub>y</sub>  | 0.382 <sup>bc</sup> <sub>x</sub> | 0.341 <sup>ab</sup> <sub>w</sub> | 0.319 <sup>a</sup>              | 0.339 <sup>a</sup> <sub>x</sub>  | 0.342 <sup>abc</sup> <sub>wx</sub> | 0.343 <sup>abc</sup> <sub>x</sub> | 0.350 <sub>w</sub> | 0.006 |
|                              | 8          | 0.385 <sup>ab</sup> <sub>y</sub> | 0.308 <sup>a</sup> <sub>w</sub>  | 0.334 <sup>a</sup> <sub>w</sub>  | 0.469 <sup>b</sup>              | 0.285 <sup>a</sup> <sub>w</sub>  | 0.287 <sup>a</sup> <sub>w</sub>    | 0.295 <sup>a</sup> <sub>w</sub>   | 0.338 <sub>w</sub> | 0.015 |
|                              | 12         | 0.365 <sup>xy</sup>              | 0.339 <sub>x</sub>               | 0.351 <sub>w</sub>               | 0.350                           | 0.346 <sub>x</sub>               | 0.362 <sub>xy</sub>                | 0.369 <sub>x</sub>                | 0.354 <sub>w</sub> | 0.005 |
|                              | Total      | 0.365 <sup>a</sup>               | 0.345 <sup>ab</sup>              | 0.354 <sup>ab</sup>              | 0.382 <sup>b</sup>              | 0.312 <sup>ab</sup>              | 0.347 <sup>ab</sup>                | 0.356 <sup>ab</sup>               |                    | 0.005 |

<sup>a-d</sup>— means in the same row (group) significant at  $p \leq 0.05$ ; <sub>w-z</sub> - means in the same column (terms) significant at  $p \leq 0.05$ ; SEM+ standard error of mean; C - control group; RM5, RM10, RM15— 5%, 10%, 15% of post-extraction rapeseed meal respectively; FRM5, FRM10, FRM15— 5%, 10%, 15% of fermented post-extraction rapeseed meal respectively
